# Supplementary material for: A morphology-dependent lattice stability investigation in ZnS nanostructures by high-pressure XAFS studies
Source: Royal Society of Chemistry journal article supplement (doi:10.1039/d2tc02043b), 2022-01-01
Supplement: d2tc02043b1.pdf [file d2tc02043b1.pdf]

## Supporting information

### **The morphology-dependent lattice stability investigation in ZnS nanostructures by high-pressure XAFS studies**

Qing Dong,<sup>ab</sup> Shujia Li,<sup>bc</sup> Ran Liu,<sup>b</sup> Bo Liu,<sup>b</sup> Qunjun Li,<sup>\*b</sup> Jaeyong Kim,<sup>\*a</sup> Bingbing Liu<sup>b</sup>

*<sup>a</sup>Institute for High Pressure, Department of Physics, Hanyang University, Seoul 04763, Republic of Korea*

*<sup>b</sup>State Key Laboratory of Superhard Materials, Jilin University, Changchun 130012, People's Republic of China*

*<sup>c</sup>Research Institute for Basic Sciences, School of Earth & Environmental Sciences, Seoul National University, Seoul 08826, Republic of Korea*

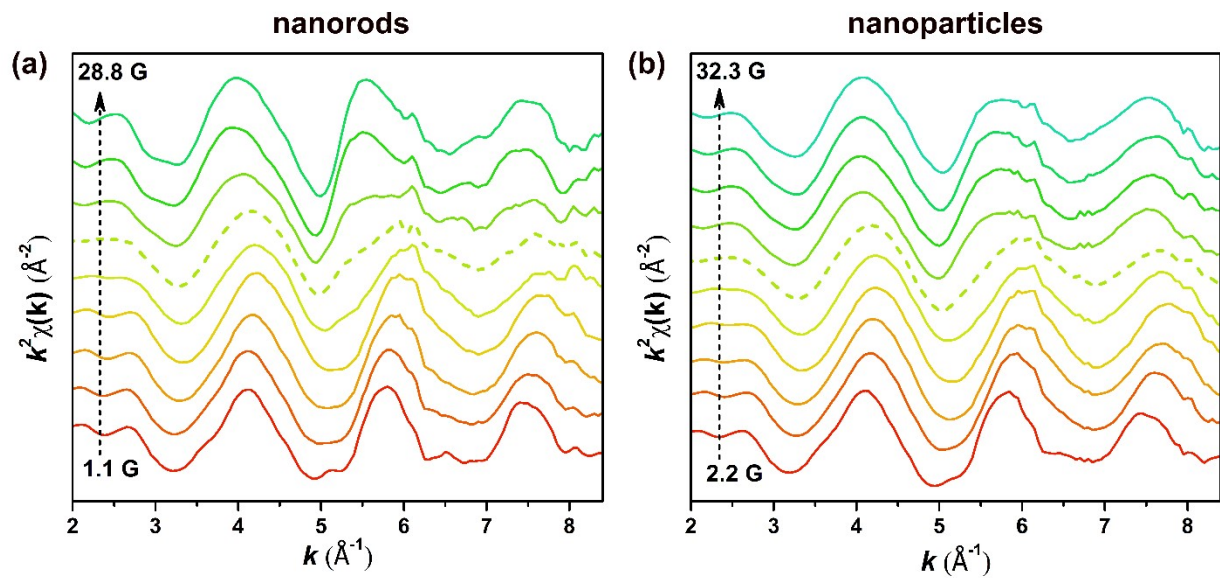

**Figure S1.** Extracted  $k^2$ -weighted XAFS spectra,  $k^2\chi(k)$ , for ZnS (c) nanorods and (d) nanoparticles at elevated pressures. The spectra in dashed lines represent the start of transition. The spectra are vertically shifted.

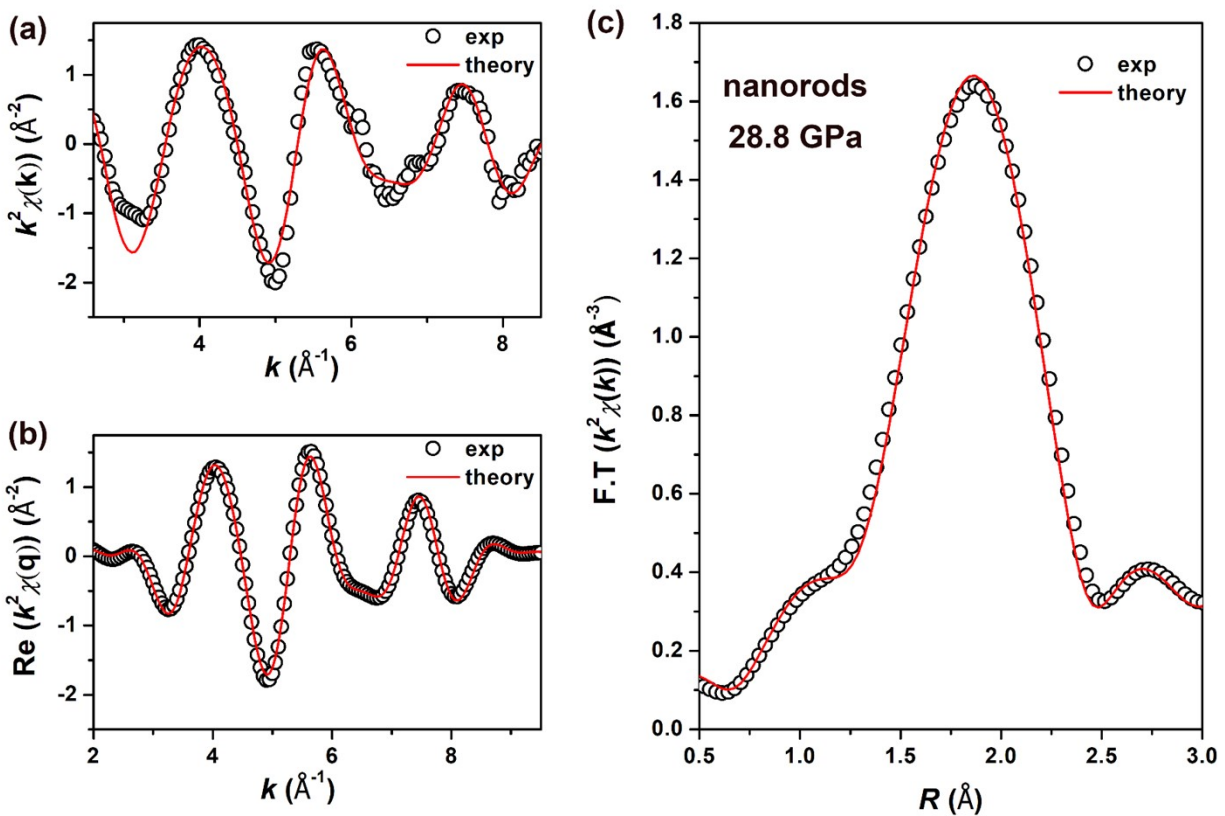

**Figure S2.** Comparison between the experimental EXAFS spectra and the best-fits corresponding to a single-distance shell at 28.8 GPa for ZnS nanorods. (a) and (b) show the extracted  $k^2\chi(k)$  signal the back-transformed  $k^2\chi(q)$  signal. (c) is the comparison in the  $R$  space.

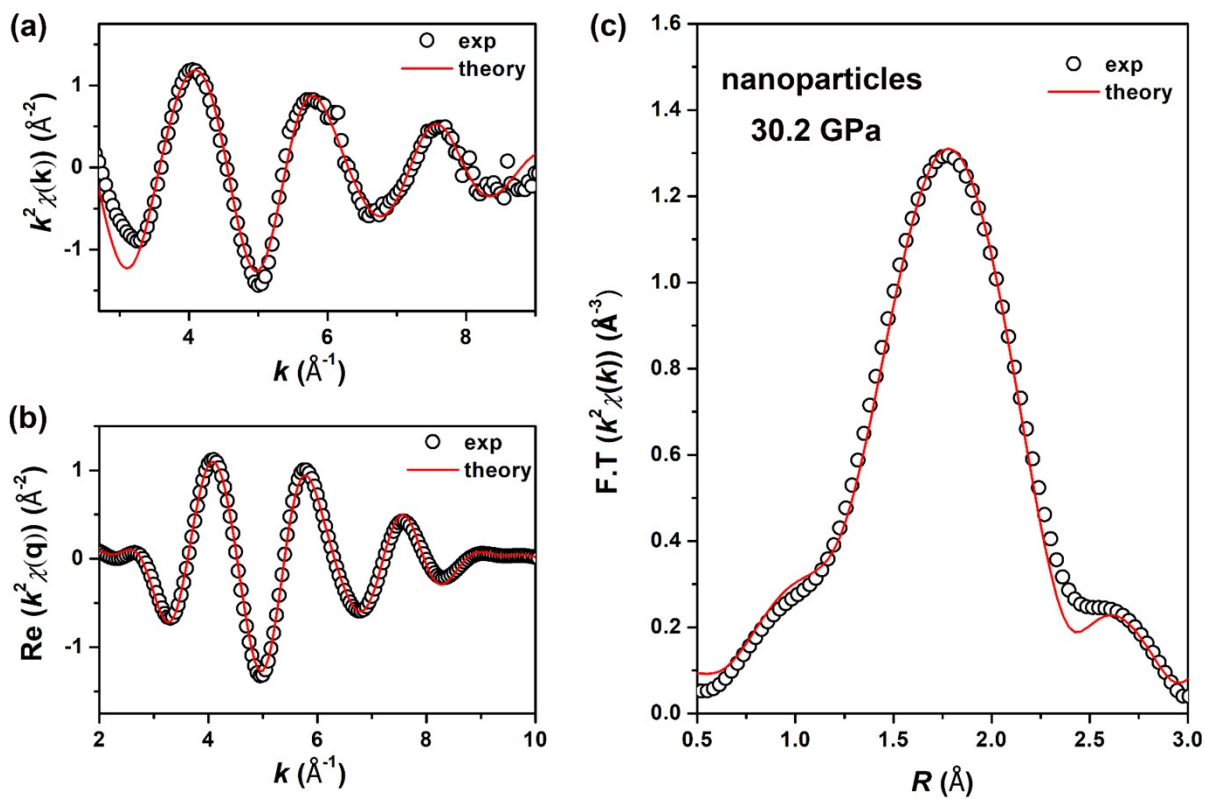

**Figure S3.** Comparison between the experimental EXAFS spectra and the best-fits corresponding to a single-distance shell at 30.2 GPa for ZnS nanoparticles. (a) and (b) show the extracted  $k^2\chi(k)$  signal the back-transformed  $k^2\chi(q)$  signal. (c) is the comparison in the  $R$  space.

**Table S1.** Fitting results of the first shell Zn-S distance,  $\sigma^2$ ,  $S_0^2$ ,  $\Delta E_0$ , and *R*-factor at selected pressures for ZnS nanorods.

| <i>P</i> (GPa) | <i>N</i> | Zn-S distance (Å) | $\sigma^2$ (Å <sup>2</sup> ) | $S_0^2$ | $\Delta E_0$ (eV) | <i>R</i> -factor |
|----------------|----------|-------------------|------------------------------|---------|-------------------|------------------|
| <b>0</b>       | 4        | 2.337±0.008       | 0.0066±0.0011                | 1.00    | 3.459             | 0.0068           |
| <b>1.1</b>     | 4        | 2.336±0.012       | 0.0054±0.0014                | 0.91    | 4.426             | 0.0095           |
| <b>3.3</b>     | 4        | 2.325±0.015       | 0.0069±0.0023                | 1.05    | 4.309             | 0.0108           |
| <b>5.3</b>     | 4        | 2.317±0.016       | 0.0077±0.0026                | 1.08    | 3.303             | 0.0168           |
| <b>9.5</b>     | 4        | 2.300±0.012       | 0.0060±0.0018                | 0.98    | 3.677             | 0.0107           |
| <b>11.8</b>    | 4        | 2.278±0.015       | 0.0025±0.0021                | 0.79    | 2.606             | 0.0181           |
| <b>14.3</b>    | 4        | 2.276±0.011       | 0.0060±0.0017                | 1.01    | 3.818             | 0.0067           |
| <b>16.1</b>    | 4        | 2.261±0.012       | 0.0060±0.0018                | 0.99    | 1.860             | 0.0065           |
| <b>17.5</b>    | 4        | 2.266±0.008       | 0.0054±0.0014                | 0.92    | 3.216             | 0.0035           |
| <b>19.6</b>    | 4        | 2.241±0.019       | 0.0076±0.0030                | 0.93    | 2.413             | 0.0234           |
|                | 5        | 2.241±0.019       | 0.0078±0.0030                | 0.81    | 1.008             | 0.0235           |
|                | 6        | 2.242±0.019       | 0.0078±0.0030                | 0.73    | 1.037             | 0.0235           |
| <b>20.7</b>    | 4        | 2.285±0.022       | 0.0138±0.0037                | 1.13    | 1.108             | 0.0215           |
|                | 5        | 2.286±0.022       | 0.0139±0.0037                | 0.92    | 1.577             | 0.0215           |
|                | 6        | 2.286±0.020       | 0.0139±0.0036                | 0.81    | 1.577             | 0.0215           |
| <b>21.9</b>    | 4        | 2.327±0.031       | 0.0176±0.0055                | 1.35    | 1.366             | 0.0392           |
|                | 5        | 2.321±0.022       | 0.0180±0.0037                | 1.12    | 1.262             | 0.0200           |
|                | 6        | 2.321±0.023       | 0.0181±0.0037                | 0.94    | 1.271             | 0.0200           |
| <b>24.6</b>    | 6        | 2.374±0.016       | 0.0123±0.0023                | 0.91    | 3.341             | 0.0138           |
| <b>26.7</b>    | 6        | 2.369±0.017       | 0.0109±0.0027                | 0.91    | 2.707             | 0.0140           |
| <b>28.8</b>    | 6        | 2.361±0.010       | 0.0104±0.0015                | 0.96    | 3.456             | 0.0040           |

**Table S2.** Fitting results of the first shell Zn-S distance,  $\sigma^2$ ,  $S_0^2$ ,  $\Delta E_0$ , and  $R$ -factor at selected pressures for ZnS nanoparticles.

| $P$ (GPa)   | $N$ | Zn-S distance ( $\text{\AA}$ ) | $\sigma^2$ ( $\text{\AA}^2$ ) | $S_0^2$ | $\Delta E_0$ (eV) | $R$ -factor |
|-------------|-----|--------------------------------|-------------------------------|---------|-------------------|-------------|
| <b>0</b>    | 4   | 2.339±0.005                    | 0.0061±0.0007                 | 0.96    | 4.027             | 0.0043      |
| <b>2.2</b>  | 4   | 2.326±0.014                    | 0.0071±0.0021                 | 0.98    | 3.001             | 0.0119      |
| <b>3.9</b>  | 4   | 2.313±0.012                    | 0.0039±0.0018                 | 0.82    | 3.111             | 0.0167      |
| <b>6.1</b>  | 4   | 2.284±0.010                    | 0.0054±0.0016                 | 0.92    | 2.198             | 0.0080      |
| <b>8.3</b>  | 4   | 2.277±0.012                    | 0.0058±0.0018                 | 0.93    | 1.860             | 0.0117      |
| <b>10.5</b> | 4   | 2.269±0.013                    | 0.0056±0.0019                 | 0.93    | 2.255             | 0.0122      |
| <b>11.9</b> | 4   | 2.273±0.020                    | 0.0084±0.0025                 | 1.01    | 3.219             | 0.0170      |
|             | 5   | 2.269±0.022                    | 0.0102±0.0042                 | 0.88    | 3.548             | 0.0242      |
|             | 6   | 2.267±0.025                    | 0.0113±0.0046                 | 0.73    | 3.668             | 0.0258      |
| <b>13.6</b> | 4   | 2.250±0.009                    | 0.0032±0.0013                 | 0.79    | 1.696             | 0.0085      |
|             | 5   | 2.250±0.009                    | 0.0033±0.0012                 | 0.71    | 2.145             | 0.0084      |
|             | 6   | 2.251±0.008                    | 0.0033±0.0012                 | 0.63    | 2.145             | 0.0083      |
| <b>15.6</b> | 4   | 2.276±0.013                    | 0.0076±0.0022                 | 0.87    | 3.615             | 0.0069      |
|             | 5   | 2.277±0.014                    | 0.0077±0.0022                 | 0.76    | 3.248             | 0.0070      |
|             | 6   | 2.277±0.014                    | 0.0077±0.0022                 | 0.68    | 3.064             | 0.0071      |
| <b>17.0</b> | 4   | 2.269±0.017                    | 0.0104±0.0025                 | 0.93    | 1.358             | 0.0145      |
|             | 5   | 2.266±0.013                    | 0.0105±0.0020                 | 0.78    | 1.456             | 0.0119      |
|             | 6   | 2.266±0.013                    | 0.0105±0.0019                 | 0.65    | 1.577             | 0.0121      |
| <b>18.7</b> | 4   | 2.344±0.017                    | 0.0112±0.0029                 | 0.95    | 2.842             | 0.0252      |
|             | 5   | 2.319±0.018                    | 0.0112±0.0030                 | 0.77    | 3.505             | 0.0246      |
|             | 6   | 2.320±0.018                    | 0.0113±0.0030                 | 0.64    | 3.477             | 0.0193      |
| <b>20.2</b> | 6   | 2.324±0.017                    | 0.0102±0.0026                 | 0.74    | 2.672             | 0.0189      |
| <b>22.2</b> | 6   | 2.310±0.012                    | 0.0128±0.0019                 | 0.78    | 0.576             | 0.0057      |
| <b>23.9</b> | 6   | 2.317±0.013                    | 0.0102±0.0021                 | 0.69    | 1.657             | 0.0098      |
| <b>25.6</b> | 6   | 2.309±0.016                    | 0.0159±0.0010                 | 1.00    | 0.610             | 0.0110      |
| <b>27.9</b> | 6   | 2.313±0.014                    | 0.0095±0.0022                 | 0.74    | 2.754             | 0.0107      |
| <b>30.2</b> | 6   | 2.299±0.014                    | 0.0117±0.0022                 | 0.80    | 1.024             | 0.0079      |
